# Supplementary figures and images for: The interwinding nature of protein–protein interfaces and its implication for protein complex formation
Source: PubMed Central journal article supplement — Bioinformatics. 2009 Sep 29;25(23):3108–13. doi: 10.1093/bioinformatics/btp563 (PMC2778332; doi:10.1093/bioinformatics/btp563), 2009-09-29

# Segment Length Distribution of Surrounded and Non-Surrounded Groups

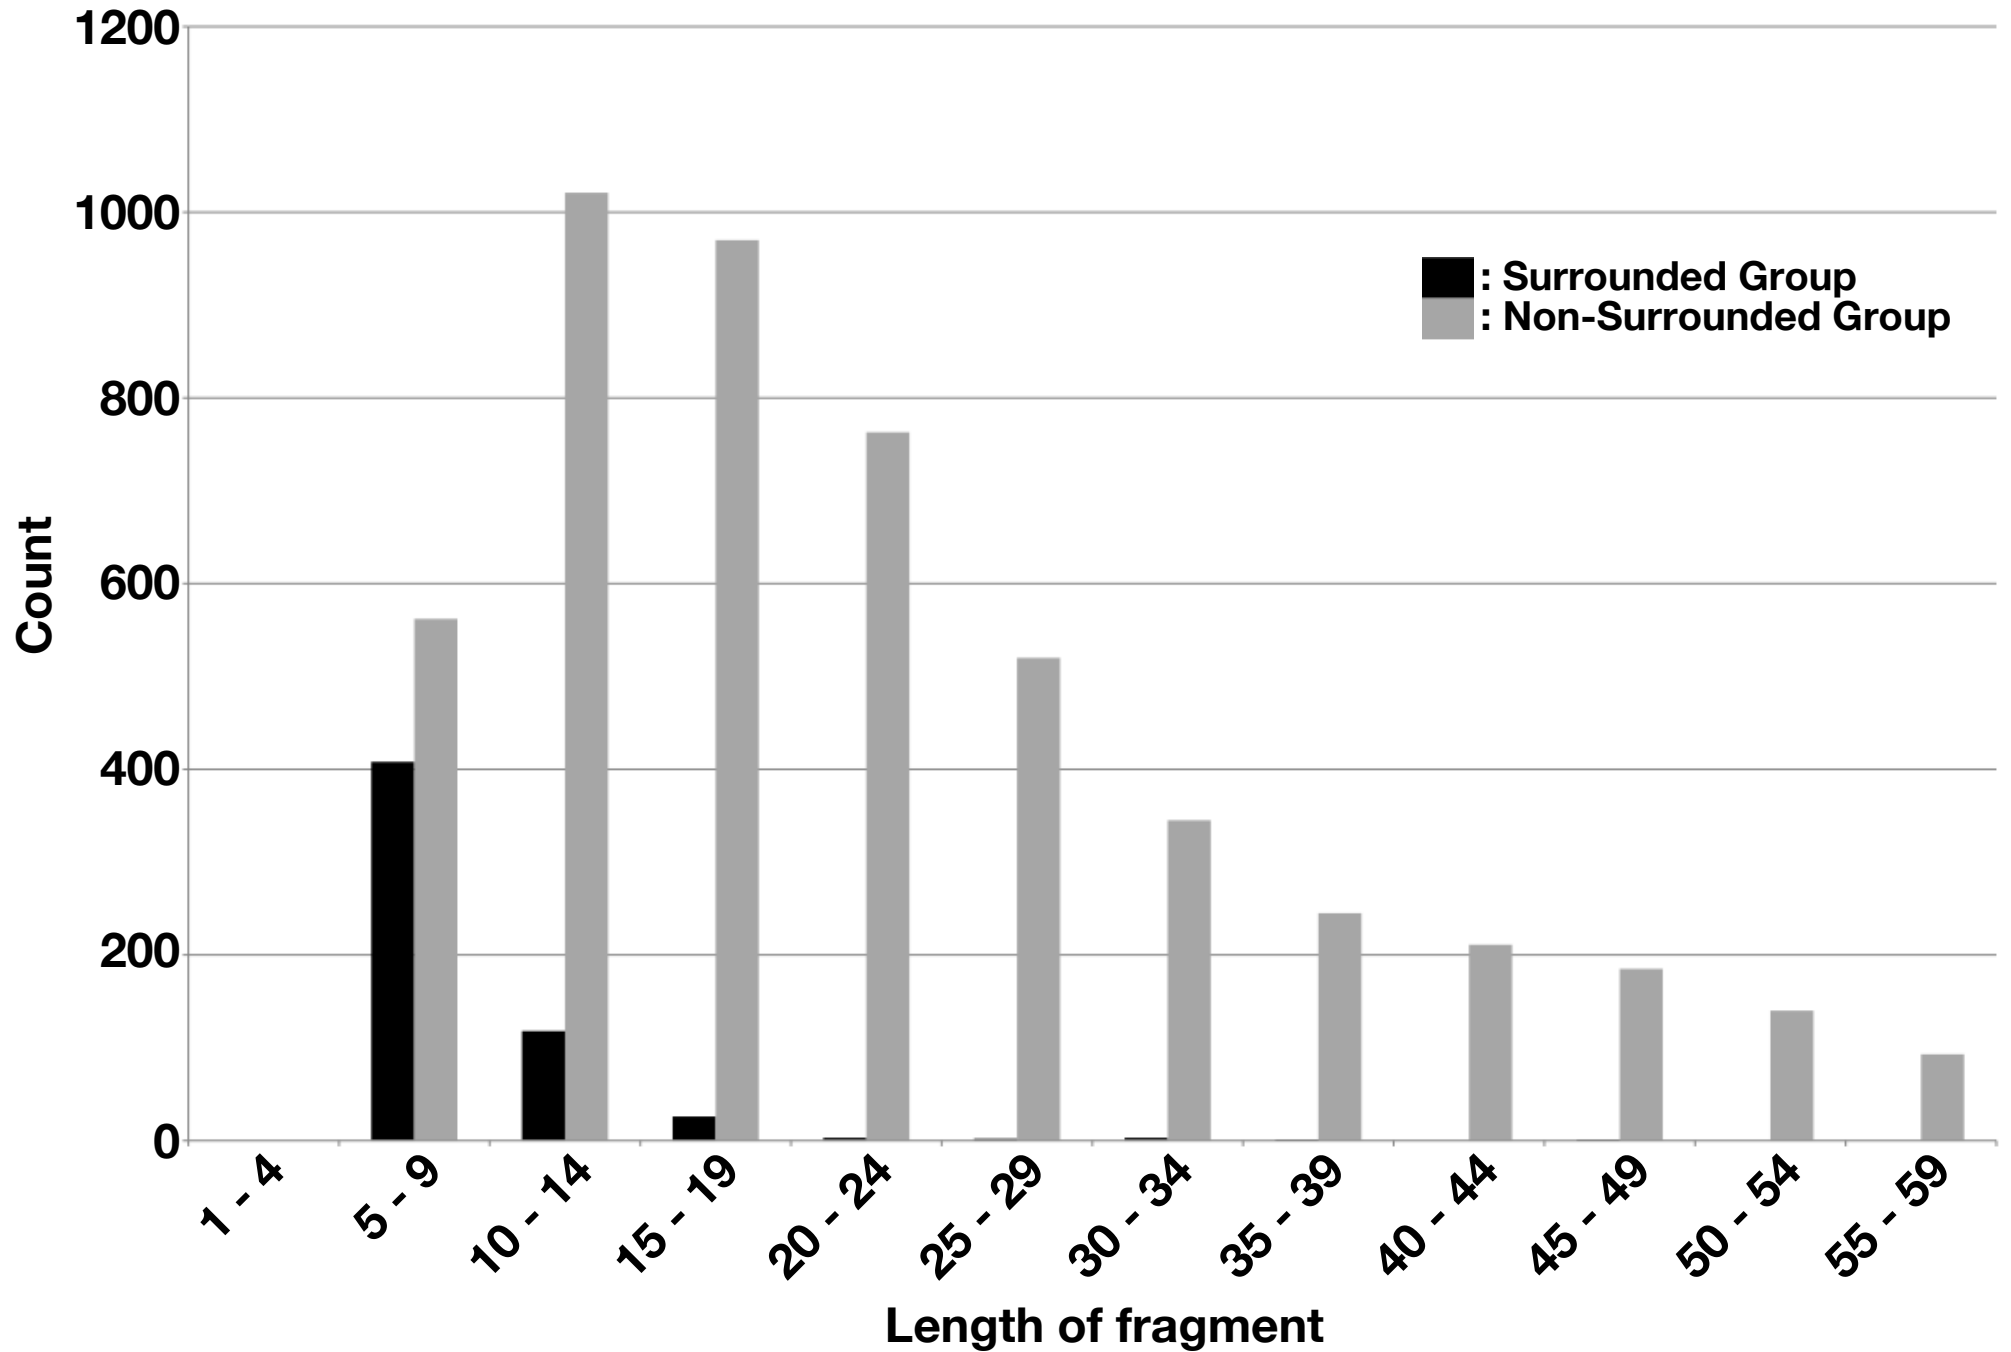

Supplement: btp563_1.pdf [file btp563_1.pdf]
